# Supplementary material for: Advanced virtual reality-based rehabilitation of balance and gait in clinical practice
Source: PubMed Central journal article supplement — Ther Adv Chronic Dis. 2019 Aug 23;10:2040622319868379. doi: 10.1177/2040622319868379 (PMC6710712; doi:10.1177/2040622319868379), 2019-08-23
Supplement: Table_e2._Clinical_Thresholds_EN_Proof.pdf [file Table_e2._Clinical_Thresholds_EN_Proof.pdf]

## Section 2: Tools for efficacy evaluation

**Table e2. Significant clinical thresholds to detect change.**

|                                                  | PD                | PS                | MS | TBI               | ON | NN |
|--------------------------------------------------|-------------------|-------------------|----|-------------------|----|----|
| <b>10MWT-ST (comfortable walking speed, m/s)</b> | 0.18 <sup>1</sup> | 0.16 <sup>2</sup> | -  | 0.15 <sup>3</sup> | -  | -  |
| <b>TUG- ST (s)</b>                               | 2 <sup>4</sup>    | 2.9 <sup>5</sup>  | -  | -                 | -  | -  |
| <b>FSST (%)</b>                                  | -                 | -                 | -  | 7.8% <sup>6</sup> | -  | -  |
| <b>BBS (points)</b>                              | 5 <sup>1</sup>    | 6.9 <sup>7</sup>  | -  | 3.83 <sup>8</sup> | -  | -  |
| <b>Mini BESTest (%)</b>                          | 17.1 <sup>9</sup> | -                 | -  | -                 | -  | -  |
| <b>ABC Scale</b>                                 | 13% <sup>1</sup>  | -                 | -  | -                 | -  | -  |

Available values of minimal detectable change or minimally clinically important difference among medical conditions. PD: Parkinson Disease & Parkinsonism; PS: Poststroke; MS: Multiple sclerosis; TBI: Traumatic Brain Injury; ON: other-neurological; NN: non-neurological.

## REFERENCES

1. Steffen T, Seney M. Test-retest reliability and minimal detectable change on balance and ambulation tests, the 36-item short-form health survey, and the unified Parkinson disease rating scale in people with parkinsonism. *Physical therapy* 2008; **88**(6): 733-46.
2. Tilson JK, Sullivan KJ, Cen SY, et al. Meaningful gait speed improvement during the first 60 days poststroke: minimal clinically important difference. *Physical therapy* 2010; **90**(2): 196-208.
3. Van Loo M, Moseley A, Bosman J, De Bie R, Hassett L. Test–re-test reliability of walking speed, step length and step width measurement after traumatic brain injury: a pilot study. *Brain Injury* 2004; **18**(10): 1041-8.
4. Lim L, Van Wegen E, De Goede C, et al. Measuring gait and gait-related activities in Parkinson's patients own home environment: a reliability, responsiveness and feasibility study. *Parkinsonism & related disorders* 2005; **11**(1): 19-24.
5. Flansbjerg U-B, Holmbäck AM, Downham D, Patten C, Lexell J. Reliability of gait performance tests in men and women with hemiparesis after stroke. *Journal of rehabilitation medicine* 2005; **37**(2): 75-82.
6. Rábago CA, Wilken JM. Application of a mild traumatic brain injury rehabilitation program in a virtual reality environment: a case study. *Journal of Neurologic Physical Therapy* 2011; **35**(4): 185-93.
7. Stevenson TJ. Detecting change in patients with stroke using the Berg Balance Scale. *Australian Journal of Physiotherapy* 2001; **47**(1): 29-38.
8. Newstead AH, Hinman MR, Tomberlin JA. Reliability of the Berg Balance Scale and balance master limits of stability tests for individuals with brain injury. *Journal of Neurologic Physical Therapy* 2005; **29**(1): 18-23.
9. Leddy AL, Crouner BE, Earhart GM. Utility of the Mini-BESTest, BESTest, and BESTest sections for balance assessments in individuals with Parkinson disease. *Journal of neurologic physical therapy: JNPT* 2011; **35**(2): 90.
